# Supplementary material
Source: PubMed Central journal article supplement (PMC3664306)
Supplement: NIHMS450054-supplement-1.pdf [file NIHMS450054-supplement-1.pdf]

# "Supplemental material"

## **MicroRNA-155 controls CD8<sup>+</sup> T cell responses by regulating interferon signaling**

**Donald T. Gracias<sup>1#</sup>, Erietta Stelekati<sup>1#</sup>, Jennifer L. Hope<sup>1</sup>, Alina C. Boesteanu<sup>1</sup>, Travis Doering<sup>2</sup>, Jillian Norton<sup>1</sup>, Yvonne M. Mueller<sup>1</sup>, Joseph A. Fraietta<sup>1</sup>, E. John Wherry<sup>2</sup>, Martin Turner<sup>3\*</sup>, Peter D. Katsikis<sup>1\*</sup>**

*<sup>1</sup>Department of Microbiology and Immunology, Center for Immunology and Vaccine Science, Drexel University College of Medicine, Philadelphia, Pennsylvania 19129, USA; <sup>2</sup>Department of Microbiology, University of Pennsylvania, Philadelphia, Pennsylvania 19104, USA; <sup>3</sup>Laboratory of Lymphocyte Signalling and Development, The Babraham Institute, Babraham, Cambridge CB22 3AT, United Kingdom*

### **Contact Information:**

\*Correspondence: P.D.K. ([peter.katsikis@drexelmed.edu](mailto:peter.katsikis@drexelmed.edu)) or M.T. ([martin.turner@babraham.ac.uk](mailto:martin.turner@babraham.ac.uk))

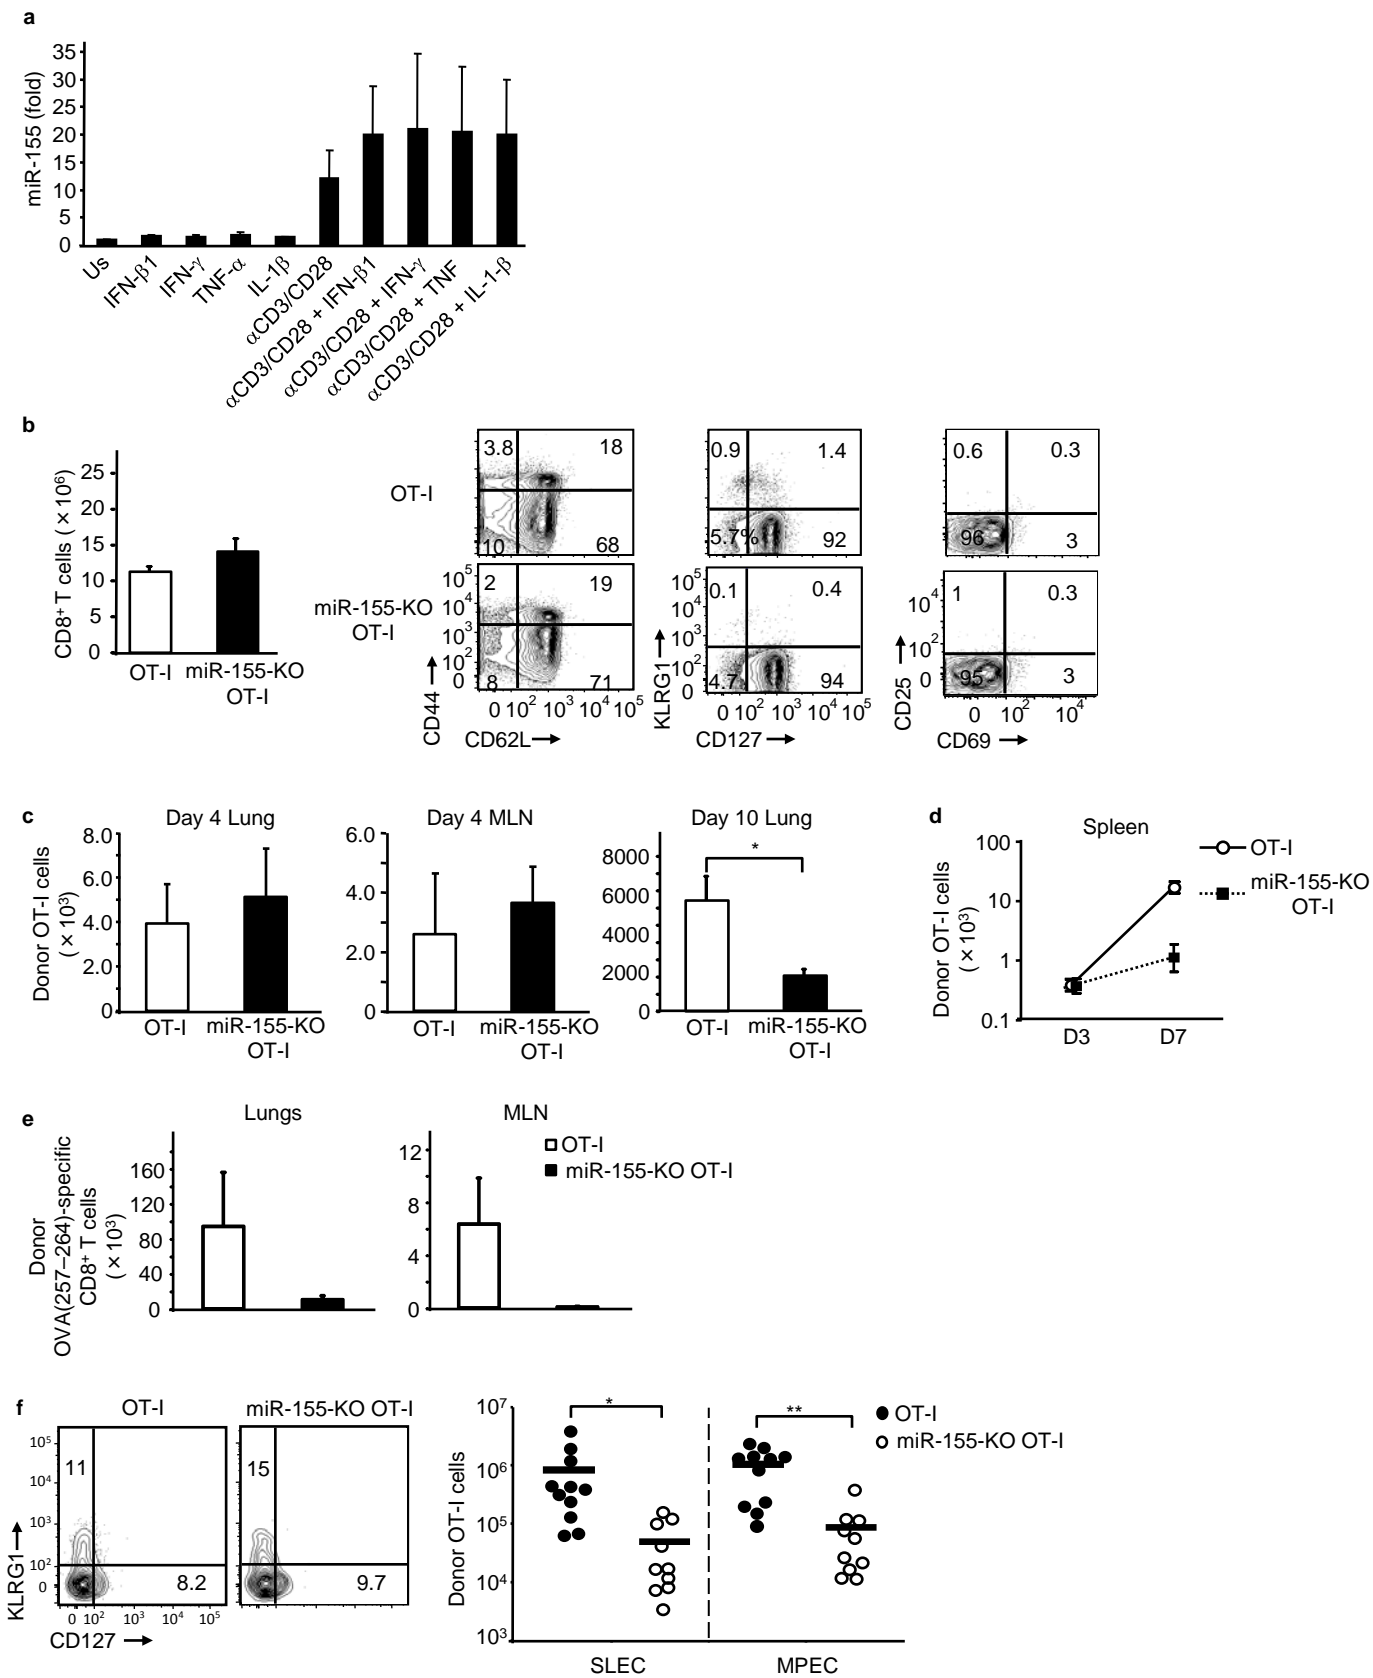

**Supplementary Figure 1.** MiR-155 induction by cytokines, and phenotype and tissue distribution of miR-155-KO OT-I cells. **(a)** Treatment of unstimulated naive CD8<sup>+</sup> T cells with 10ng/ml of TNF, IFN- $\gamma$ , IL-1- $\beta$  or 1000U/ml IFN- $\beta$  for 24h does not increase miR-155 levels. These cytokines only modestly increased further these levels in activated CD8<sup>+</sup> T cells. Pooled data from 5 experiments shown. **(b)** CD8<sup>+</sup> T cell numbers, naive/memory phenotype and activation status of splenic CD8<sup>+</sup> T cells in uninfected OT-I and miR-155-KO OT-I mice. Representative flow cytometric plots shown from 3 experiments performed. Numbers in plots indicate percent of CD8<sup>+</sup> T cells. **(c)** Day 4 lung and MLN miR-155-KO OT-I cell numbers after adoptive transfer into WSN-OVA infected animals. Day 10 lung miR-155-KO OT-I cells shown for comparison. In order to visualize cells early,  $5 \times 10^5$  cells were transferred. Data from 2 experiments and  $n=6$ . \* $P < 0.05$  (Student's t-test). **(d)** Days 3 and 7 splenic miR-155-KO OT-I cell numbers after adoptive transfer into LM-OVA infected animals. In order to visualize cells early,  $5 \times 10^5$  cells were transferred. Data from 2 experiments and  $n=5-6$ . **(e)** Day 60 memory miR-155-KO OT-I and wild-type OT-I in the MLN and lungs of mice that received adoptive transfers of wild type and miR-155-KO CD8<sup>+</sup> T cells and were infected with WSN-OVA influenza virus. Memory in spleens is shown in Figure 1. Bars show mean  $\pm$  SEM and are from 2 independent experiments ( $n=5$ ). **(f)** MiR-155 deficiency does not selectively affect SLEC or MPEC during the primary response. Both SLEC and MPEC numbers are reduced on day 10 of infection. Left: Representative flow cytometric plots of day 10 shown. Numbers in plots indicate percent of CD8<sup>+</sup> T cells. Right: Data from 3 experiments  $n=9-11$ . \* $P < 0.05$ , \*\* $P < 0.003$  (Student's t-test).

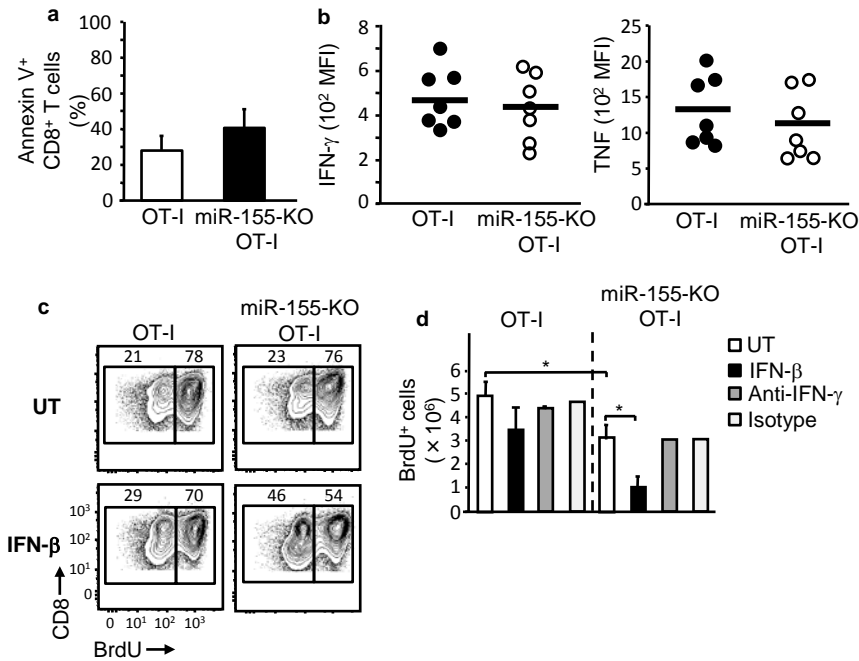

**Supplementary Figure 2.** Apoptosis, cytokine production and IFN sensitivity of miR-155-KO CD8<sup>+</sup> T cells. **(a)** *In vitro* apoptosis of miR-155-KO OT-I and OT-I cells stimulated with peptide loaded irradiated splenocytes. Day 4 cultures shown. Data from 5 experiments and  $n=5$  per group. **(b)** MFI for IFN- $\gamma$  and TNF intracellular stain after *ex vivo* peptide stimulation of miR-155-KO OT-I and OT-I cells. Day 10 post-infection shown. Data from 3 experiments and  $n=7$ . **(c)** and **(d)** miR-155-KO CD8<sup>+</sup> T cells are sensitive to Type I IFN-mediated inhibition. miR-155-KO and wild-type OT-I cells were stimulated with OVA(257–264)-pulsed irradiated splenocytes and cultured with media containing IL-7, IL-15 and IL-2 for 6 days. During the last 3 days cell were treated  $\pm$  IFN- $\beta$  or left untreated (UT). BrdU was added during the last 20h. **(c)** Representative flow cytometric plots showing reduced BrdU incorporation by miR-155-KO OT-I CD8<sup>+</sup> T cells in the presence of IFN- $\beta$ . Numbers in plots indicate percent of CD8<sup>+</sup> T cells. **(d)** Bar graph depicting mean  $\pm$  SEM reduction in number of live BrdU<sup>+</sup> miR-155-KO OT-I CD8<sup>+</sup> T cells with addition of IFN- $\beta$ . Data from 3 independent experiments ( $n=3$  per group). \* $P < 0.008$  (Student's t-test).

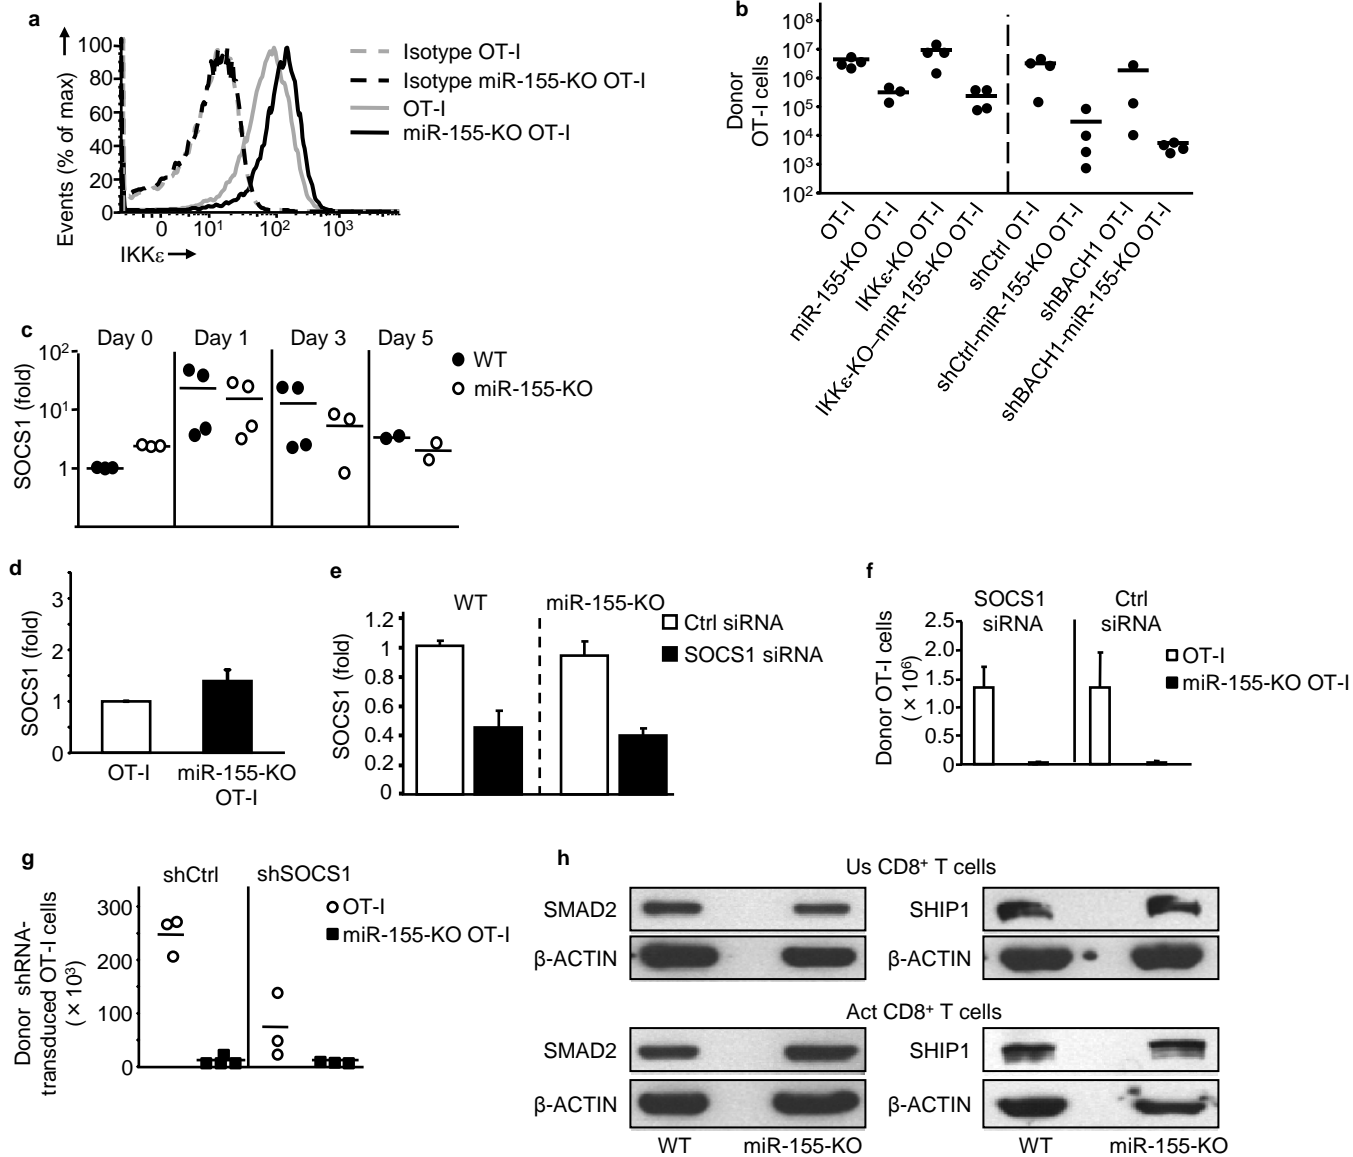

**Supplementary Figure 3.** IKK $\epsilon$ , Bach1, SOCS-1, SHIP-1 and SMAD2 do not mediate the defect of miR-155-KO CD8<sup>+</sup> T cells. **(a)** Representative histogram showing increased IKK $\epsilon$  protein expression in activated miR-155-KO CD8<sup>+</sup> T cells. Data representative of 4 independent experiments shown. **(b)** IKK $\epsilon$  deficiency and Bach1 shRNA retroviral knockdown in miR-155-KO OT-I cells does not restore responses. Dot plots depict numbers of donor OVA(257–264)-specific CD8<sup>+</sup> T cells in the lungs day 10 post-infection. Recipient mice were transferred with either miR-155-KO OT-I, IKK $\epsilon$ -KO OT-I, miR-155-KO IKK $\epsilon$ -KO OT-I or wild-type OT-I cells, and then infected one day later with WSN-OVA. For Bach1 knockdowns, miR-155-KO OT-I or control OT-I cells were transduced with retroviruses expressing Bach1 shRNA or control shRNA and 48h later intravenously transferred into recipient mice which were then infected with WSN-OVA. **(c)** SOCS-1 mRNA levels are not increased in activated purified miR-155-KO compared to wild-type CD8<sup>+</sup> T cells. RT-PCR data from 2 experiments shown. **(d)** Activated miR-155-KO OT-I cells do not express significantly more SOCS1 mRNA than wild-type OT-I. miR-155-KO and wild-type OT-I cells were stimulated with OVA(257–264)-pulsed irradiated splenocytes for 4 days and SOCS1 measured by RT-PCR. **(e)** SOCS-1 siRNA reduces SOCS-1 mRNA levels by ~60% in purified OT-I and miR-155-KO OT-I cells after 72h. Non-targeting control siRNA had no effect on SOCS-1 levels. **(f)** SOCS-1 siRNA transfection of miR-155-KO OT-I cells does not restore their *in vivo* expansion. Numbers of donor OVA(257–264)-specific CD8<sup>+</sup> T cells in lungs shown. Cells were transfected for 72h and then adoptively transfer into congenic hosts that were infected with WSN-OVA influenza virus. Data are from 2 independent experiments and  $n=6$  mice per group. **(g)** Transduction of miR-155-KO OT-I cells with retroviruses expressing SOCS1 shRNA failed to restore their expansion. Cells were retrovirally transduced for 48h, adoptively transferred and infected as described above ( $n=3-4$  mice per group). **(h)** Protein levels of SHIP1 and SMAD2 by immunoblotting in unstimulated (Us) and activated (Act) miR-155-KO CD8<sup>+</sup> T cells did not differ from wild-types. CD8<sup>+</sup> T cells were activated with anti-CD3 and anti-CD28 antibodies. Blots are representative of 2 independent experiments ( $n=2$  per group).

**Supplementary Table 1:** Differentially expressed genes between *in vitro* activated wild-type and miR-155-KO CD8<sup>+</sup> T cells, as identified by SAM analysis (delta=1.6, FDR=0.082).

| Downregulated    |                           |                        |                      | Upregulated            |                      |                      |                           |
|------------------|---------------------------|------------------------|----------------------|------------------------|----------------------|----------------------|---------------------------|
| >2.00 - fold     |                           |                        |                      |                        |                      |                      |                           |
| <i>Hist1h2ab</i> |                           |                        |                      | <i>Fbxw10</i>          | <i>Rtp4</i>          | <i>Trim16</i>        | <i>Klhdc1</i>             |
| <i>Hist1h2bb</i> |                           |                        |                      | <i>Slfn5</i>           | <i>Rundc3b</i>       | <i>Xaf1</i>          | <i>Tas2r143</i>           |
|                  |                           |                        |                      | <i>Dhrs3</i>           |                      |                      |                           |
| 1.99–1.50 - fold |                           |                        |                      |                        |                      |                      |                           |
| <i>Slc16a3</i>   | <i>Hist1h4h</i>           |                        |                      | <i>Ifit3</i>           | <i>Gstt1</i>         | <i>Art2a</i>         | <i>OTTMUSG00000005523</i> |
| <i>Gm5452</i>    | <i>Hist1h4i</i>           |                        |                      | <i>Gm5970</i>          | <i>Sgms1</i>         | <i>Trib2</i>         | <i>Lyst</i>               |
| <i>Tkl-1</i>     | <i>Fanca</i>              |                        |                      | <i>Gm12258</i>         | <i>Zbp1</i>          | <i>Slfn9</i>         | <i>Irf7</i>               |
| <i>Mrpl39</i>    | <i>Dsc1</i>               |                        |                      | <i>Nr1d2</i>           | <i>Ect2l-11</i>      | <i>5830416P10Rik</i> | <i>Ppp3cc-1</i>           |
| <i>Nuf2</i>      | <i>Hist1h2bh</i>          |                        |                      | <i>Arhgap26</i>        | <i>Rragd</i>         | <i>Slco3a1</i>       | <i>Tspan14</i>            |
|                  | <i>Kif15</i>              |                        |                      | <i>Acpp</i>            | <i>H2-T24</i>        | <i>N4bp1</i>         | <i>Gm6907</i>             |
|                  |                           |                        |                      | <i>Fam26f</i>          | <i>9330175E14Rik</i> | <i>Oasl2</i>         |                           |
|                  |                           |                        |                      | <i>D730003I15Rik</i>   | <i>Gbp3</i>          |                      |                           |
| 1.49–1.20 - fold |                           |                        |                      |                        |                      |                      |                           |
| <i>Kif11</i>     | <i>Pebp1-2</i>            | <i>2210021J22Rik</i>   | <i>Mcm5</i>          | <i>Gvin1-2</i>         | <i>Itga6</i>         | <i>Lmbrd1</i>        | <i>Ifit2</i>              |
| <i>Ppic</i>      | <i>Zmiz1</i>              | <i>Mrps23</i>          | <i>Pla2g15</i>       | <i>Tbc1d23</i>         | <i>Zfp420</i>        | <i>Eif1-1</i>        | <i>Uvr9</i>               |
| <i>Ak311-1</i>   | <i>Wdr90</i>              | <i>Itgb3bp-1</i>       | <i>Snrpe</i>         | <i>Cirbp</i>           | <i>2810021J22Rik</i> | <i>Brwd1</i>         | <i>Nsun4</i>              |
| <i>Fam84a</i>    | <i>Snrpd2-2</i>           | <i>Unc13a</i>          | <i>Gm8944-1</i>      | <i>Impg2</i>           | <i>Ccpg1</i>         | <i>Zpbp2</i>         | <i>Cd151-1</i>            |
| <i>Prelid2</i>   | <i>Dtl</i>                | <i>Tmsb10</i>          | <i>Gm8944</i>        | <i>Sgk3</i>            | <i>6430601O08Rik</i> | <i>Sdcbp</i>         | <i>1700034F02Rik</i>      |
| <i>Acs16</i>     | <i>Pgk1-1</i>             | <i>Ndufaf2</i>         | <i>Gjb3</i>          | <i>Icosl</i>           | <i>Tgtp-1</i>        | <i>Myo9a-8</i>       | <i>Poli</i>               |
| <i>Cd160</i>     | <i>Pgk1-2</i>             | <i>Snrpd2-4</i>        | <i>Eif3i</i>         | <i>Fam46c</i>          | <i>B430306N03Rik</i> | <i>Gbp5</i>          | <i>Hectd3</i>             |
| <i>Slc2a3</i>    | <i>Pgk1</i>               | <i>Hn11-2</i>          | <i>Alkbh7</i>        | <i>Ifngr1</i>          | <i>Tgtp</i>          | <i>Trappc2</i>       | <i>Dnajc7</i>             |
| <i>Fam111a</i>   | <i>Eif4a3-2</i>           | <i>Snrpd2</i>          | <i>Slc2a1</i>        | <i>Trat1</i>           | <i>Arid4a</i>        | <i>Kidins220</i>     | <i>Irf1</i>               |
| <i>Ankrd37</i>   | <i>Calm3</i>              | <i>Serf1-1</i>         | <i>Hprt1</i>         | <i>Dennd4c</i>         | <i>Ifngr2</i>        | <i>AI606181</i>      | <i>Arl15</i>              |
| <i>Gm4924</i>    | <i>Tbl3</i>               | <i>Acaca-1</i>         | <i>1700001E04Rik</i> | <i>1700109H08Rik</i>   | <i>Parp10</i>        | <i>0610040B10Rik</i> | <i>Rab33b</i>             |
| <i>Hnrpll</i>    | <i>3110082I17Rik</i>      | <i>E2f1</i>            | <i>Nucb1</i>         | <i>Stat2</i>           | <i>D14Erd668e</i>    | <i>Cript</i>         | <i>Bat5</i>               |
| <i>Tkl</i>       | <i>Cox4i1</i>             | <i>1700065D16Rik</i>   | <i>4930422G04Rik</i> | <i>Nqo1</i>            | <i>Fam55c</i>        | <i>Dtx3l</i>         | <i>Mobk13</i>             |
| <i>Pfkl</i>      | <i>Ankle1</i>             | <i>Syce2</i>           | <i>Angptl2</i>       | <i>Ube2d1</i>          | <i>1700102P08Rik</i> | <i>Mppe1</i>         | <i>Kdm2a-1</i>            |
| <i>H2afx</i>     | <i>Gm5050</i>             | <i>Cenpm</i>           | <i>Erbp3</i>         | <i>A530023O14Rik</i>   | <i>Rps6ka5</i>       | <i>Wdr37</i>         | <i>Zfp263</i>             |
| <i>Ccdc50</i>    | <i>C1qbp</i>              | <i>Cad</i>             | <i>Cotl1</i>         | <i>Il7r</i>            | <i>Zbtb16</i>        | <i>Prdm2</i>         | <i>Picalm</i>             |
| <i>Anxa6</i>     | <i>Tomm7</i>              | <i>Mtif3</i>           | <i>Rgs1</i>          | <i>Sft2d2</i>          | <i>Serf2</i>         | <i>Csnk1g2</i>       | <i>9530048O09Rik</i>      |
| <i>E2f3-1</i>    | <i>Lsm3</i>               | <i>Slc9a5</i>          | <i>Ndufa8</i>        | <i>9530009G21Rik</i>   | <i>A530017D24Rik</i> | <i>Gm5039-2</i>      | <i>Ubl3</i>               |
| <i>Ngfrap1</i>   | <i>Dnmt3a</i>             | <i>D830030K20Rik-5</i> | <i>Mcm7</i>          | <i>5930434B04Rik-1</i> | <i>AU042671-2</i>    | <i>Gpr21</i>         | <i>Map3k7ip2</i>          |
| <i>Fam162a</i>   | <i>Nup155</i>             | <i>D830030K20Rik-2</i> | <i>Rnf26-1</i>       | <i>Inpp4b</i>          | <i>L1cam</i>         | <i>Parp9</i>         | <i>BC030336</i>           |
| <i>Mogs</i>      | <i>Prmt1</i>              | <i>RP23-38E20.1-2</i>  | <i>Med9</i>          | <i>Jarid2</i>          | <i>Ctns</i>          | <i>Mef2a</i>         | <i>Kbtbd3</i>             |
| <i>Prim1</i>     | <i>Pole</i>               | <i>Pgam1-1</i>         | <i>Ubash3a</i>       | <i>Ncoa3</i>           | <i>Sla2</i>          | <i>Gm9964</i>        | <i>Gm10374</i>            |
| <i>Smyd2</i>     | <i>Tmsb10-1</i>           | <i>Pgam1</i>           | <i>Agpat6</i>        | <i>4930453N24Rik</i>   | <i>Tgfbr1</i>        | <i>Vps13c</i>        | <i>Dapp1</i>              |
| <i>Ncapd2</i>    | <i>Dapl1</i>              | <i>Nup85</i>           | <i>Tubg2</i>         | <i>Rb1cc1-1</i>        | <i>Sike1</i>         | <i>Eef2k</i>         | <i>201011101Rik</i>       |
| <i>Gm12260</i>   | <i>5330426P16Rik</i>      | <i>Gm8824</i>          | <i>Atp5e</i>         | <i>Msi2</i>            | <i>Ahr</i>           | <i>Gclc</i>          | <i>Ccdc130</i>            |
| <i>Snrpd2-3</i>  | <i>Shmt1</i>              | <i>Snrpd2-1</i>        | <i>Chaf1b</i>        | <i>Tnfaip3</i>         | <i>Nfe2l2</i>        | <i>Tspo</i>          | <i>Rusc1</i>              |
| <i>Prmt1</i>     | <i>Pgm2</i>               | <i>Gdf11</i>           | <i>Tmsb10-1</i>      | <i>Gimap9</i>          | <i>D130062J21Rik</i> | <i>A230046K03Rik</i> | <i>Cdk3</i>               |
| <i>Pole</i>      | <i>Nrip3</i>              | <i>Tctex1d2</i>        | <i>Dapl1</i>         | <i>Arhgef12</i>        | <i>Kbtbd2</i>        | <i>Sgcb</i>          | <i>Mlycd</i>              |
|                  | <i>ENSMUSG00000079376</i> | <i>9530058B02Rik</i>   |                      | <i>Tmx4</i>            | <i>Vps54</i>         | <i>Kras</i>          | <i>Gpr146</i>             |
|                  |                           |                        |                      | <i>Smad5</i>           | <i>Prickle3</i>      | <i>Zfp512</i>        | <i>Plk3</i>               |
|                  |                           |                        |                      | <i>Smcr8</i>           | <i>Inpp5d</i>        | <i>Klf7</i>          |                           |
|                  |                           |                        |                      | <i>Nin</i>             | <i>Aff4</i>          | <i>Pde4b</i>         |                           |
